# Supplementary material for: Improved charge carrier lifetime in planar perovskite solar cells by bromine doping
Source: PubMed Central journal article supplement (PMC5159823; doi:10.1038/srep39333), 2016-12-16
Supplement: srep39333-s1.pdf [file srep39333-s1.pdf]

## Supporting Information

### Improved charge carrier lifetime in planar perovskite solar cells by bromine doping

David Kiermasch, Philipp Rieder, Kristofer Tvingstedt, Andreas Baumann, Vladimir Dyakonov

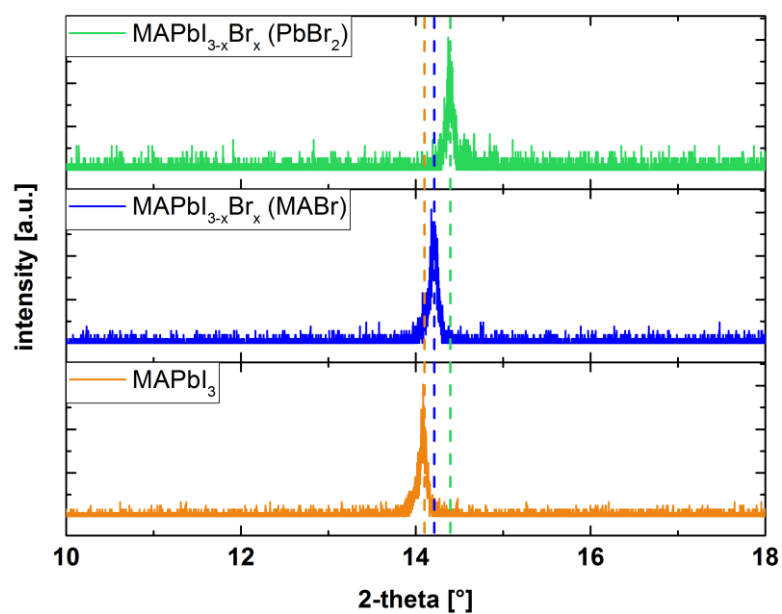

**Figure S1.** XRD spectra of mixed halide perovskite layers using PbI<sub>2</sub> + MAI (orange), PbI<sub>2</sub> + MAI/MABr (blue) and PbBr<sub>2</sub> + MAI (green) as precursor salts. Introducing bromine in the perovskite crystal leads to a decreased lattice constant.

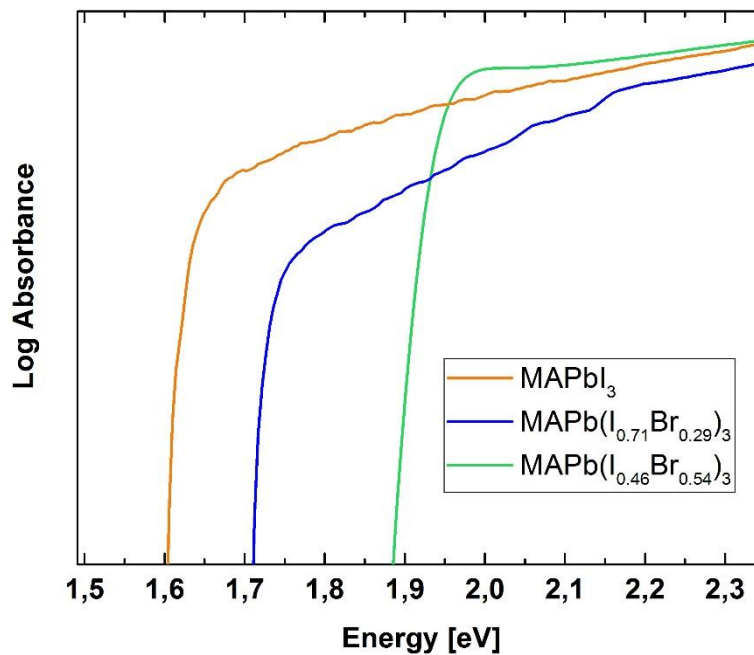

**Figure S2.** Optical absorption spectra for all studied perovskite films. According to Noh et al. and Gil-Escrig et al. we determined the band gap and estimated the bromine-to-iodine ratio for the  $\text{MAPb}(\text{I}_{1-x}\text{Br}_x)_3$  layers<sup>1,2</sup>. For the  $\text{PbI}_2 + \text{MAI/MABr}$  approach we calculated  $x$  to be 0.29. In case of  $\text{PbBr}_2 + \text{MAI}$  the bromine content was increased up to 0.54.

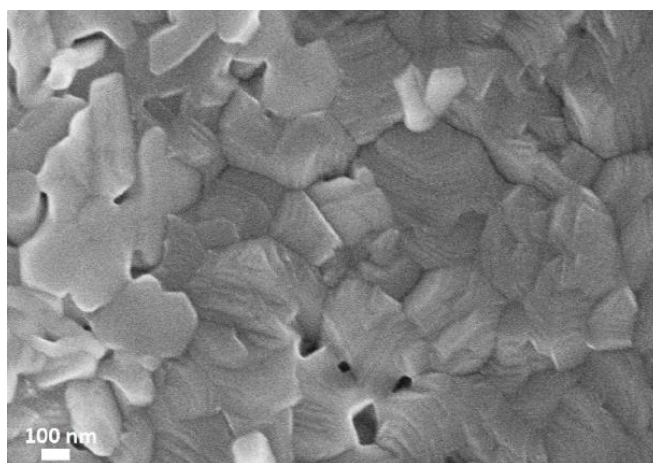

**Figure S3.** Surface SEM image of the resulting perovskite layer using  $\text{NH}_4\text{Cl}$  and DIO as additives in the  $\text{PbI}_2$ -solution. The additives lead to an increased crystal domain size without changing the lattice structure by slowing down the chemical reaction.

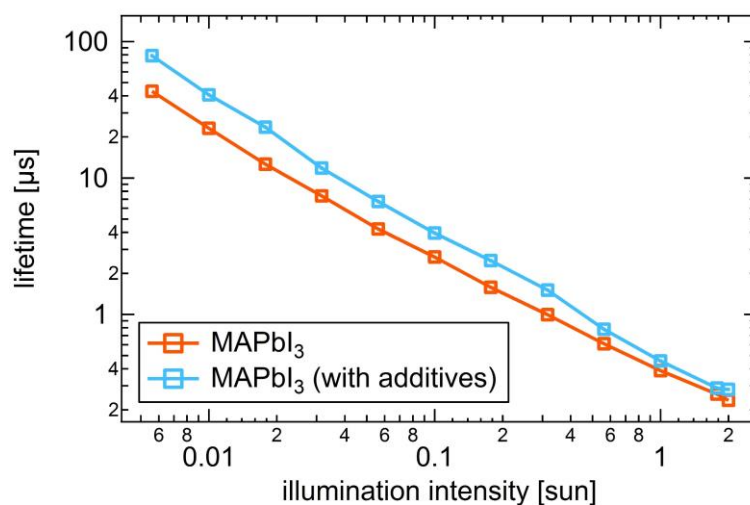

**Figure S4.** Impact of crystal domain size (varied by adding  $\text{NH}_4\text{Cl}$  and DIO to the  $\text{PbI}_2$ -solution) on charge carrier lifetimes measured with TPV. An increase in  $\tau$  with crystal domain size by a factor of 1.18 at 1 sun illumination can be observed.

## References

- [1] Noh, J. H., Im, S. H., Heo, J. H., Mandal, T. N. & Seok, S. I. Chemical Management for Colorful, Efficient, and Stable Inorganic–Organic Hybrid Nanostructured Solar Cells. *Nano Lett.* **13**, 1764-1769 (2013)
- [2] Gil-Escrig, L., Miquel-Sempere, A., Sessolo, M. & Bolink, H.J. Mixed Iodide-Bromide Methylammonium Lead Perovskite-based Diodes for Light Emission and Photovoltaics. *J. Phys. Chem. Lett.* **6**, 3743-3748 (2015)
